# Supplementary material for: Diversity pattern of Duffy binding protein sequence among Duffy-negatives and Duffy-positives in Sudan
Source: PubMed Central journal article supplement (PMC6098642; doi:10.1186/s12936-018-2425-z), 2018-08-17
Supplement: 12936_2018_2425_MOESM2_ESM.pdf [file 12936_2018_2425_MOESM2_ESM.pdf]

**Additional file 2.** Haplotypes based on 10 common polymorphism sites in Sudan isolates

| Haplotype in Fig 1A | SNPs on 10 AA positions <sup>a</sup> | Total | Percentage | Code in previous study <sup>b</sup> |
|---------------------|--------------------------------------|-------|------------|-------------------------------------|
| Sal-1               | G A A G G G T T T T                  | 0     | 0          | 12                                  |
| 1                   | G A A G G G A A C A                  | 11    | 26.19      | 4                                   |
| 2                   | T G G A T G A A C A                  | 7     | 16.67      | 70                                  |
| 3, 5, 11            | G G G G G G A A C A                  | 12    | 28.57      | 43                                  |
| 4                   | G A G G G A T A T T                  | 5     | 11.90      | 22                                  |
| 6, 10               | G A G G G A T T T A                  | 4     | 9.52       | 23                                  |
| 7                   | G A G G G A T T T T                  | 1     | 2.38       | 24                                  |
| 8                   | G G G A T A A A C A                  | 1     | 2.38       | 33                                  |
| 9                   | G A G G G G A A C A                  | 1     | 2.38       | 25                                  |

<sup>a</sup> Ten non-synonymous single nucleotide polymorphisms: nt 924 (R308S), 1111 (K371E), 1151 (G384D), 1153 (E385K), 1158 (K386N), 1169 (H390R), 1251 (N417K), 1270 (L424I), 1309 (W437R), and 1508 (I503K), <sup>b</sup> [22]. Note that haplotypes 5 and 11, and 10 correspond to haplotypes 3 and 6, respectively, because 10 non-synonymous SNPs out of 14 non-synonymous SNPs (Fig 1A) were considered in this analysis.
